# Supplementary material
Source: PubMed Central journal article supplement (PMC10527568)
Supplement: NIHMS1909202-supplement-4.pdf [file NIHMS1909202-supplement-4.pdf]

650 **Supplemental Figure 1: Sample and variable selection**

651 **[see attached: “ML Supplemental Figure 1.pdf”]**

652 *Figure legend: Participant breakdown and variable inclusion. EFA = exploratory factor*

653 *analysis.*

654 **Supplemental Table 1: Sample Characteristics (pre- and post-imputation)**

| Category                               | Measure                              | Pre-imputation |             |                      | Missing (pre-imputation, %) | Post-imputation |             |                      |
|----------------------------------------|--------------------------------------|----------------|-------------|----------------------|-----------------------------|-----------------|-------------|----------------------|
|                                        |                                      | Livebirths     | Stillbirths | P-value <sup>1</sup> |                             | Livebirths      | Stillbirths | P-value <sup>1</sup> |
| Delivery-related (not in models)       | Delivery mode (cesarean)             | 1087 (36.8)    | 145 (14.8)  | <0.001               | NA                          |                 |             |                      |
|                                        | Gestational age (GA) at delivery     | 36.1 ± 5.6     | 27.9 ± 6.8  | <0.001               | NA                          |                 |             |                      |
|                                        | Fetal weight (g) at delivery/autopsy | 2896 ± 1030    | 1337 ± 1151 | <0.001               | NA                          |                 |             |                      |
| Demographics (maternal)                | Age (years)                          | 27.6 ± 6.2     | 27.8 ± 6.8  | 0.9                  | 0.35                        |                 |             |                      |
|                                        | Education (years)                    | 13.2 ± 3.0     | 12.8 ± 2.9  | <b>0.008</b>         | 41.0                        | 13.2 ± 2.4      | 13.0 ± 2.4  | <b>0.006</b>         |
|                                        | Ethnicity (Hispanic)                 | 753 (35.9)     | 360 (37.0)  | 0.5                  | 22.9                        | 755 (25.2)      | 360 (36.7)  | <0.001               |
|                                        | Race (minority)                      | 1281 (42.7)    | 237 (24.1)  | <0.001               | 0.00                        |                 |             |                      |
|                                        | Born in United States                | 1415 (79.4)    | 451 (78.6)  | 0.7                  | 40.8                        | 2551 (85.0)     | 769 (78.3)  | <0.001               |
|                                        | Interview conducted in English       | 1591 (89.0)    | 510 (88.5)  | 0.8                  | 40.6                        | 2792 (93.1)     | 891 (90.7)  | <b>0.016</b>         |
| Demographics (biologic father of baby) | Ethnicity (Hispanic)                 | 667 (37.8)     | 204 (35.9)  | 0.4                  | 41.4                        | 758 (25.3)      | 359 (36.6)  | <0.001               |
|                                        | Race (minority)                      | 673 (22.4)     | 253 (25.8)  | <b>0.032</b>         | 0.00                        |                 |             |                      |
|                                        | Education (years)                    | 13.0 ± 3.3     | 12.8 ± 3.0  | 0.087                | 43.8                        | 13.1 ± 2.7      | 12.8 ± 2.5  | <0.001               |
|                                        | Born in United States                | 1335 (75.6)    | 431 (75.9)  | 0.9                  | 41.4                        | 2538 (84.6)     | 794 (80.9)  | <b>0.006</b>         |
| Family history                         | Chromosomal anomaly                  | 70 (2.3)       | 31 (3.2)    | 0.2                  | 0.00                        |                 |             |                      |
|                                        | Congenital disorder                  | 207 (6.9)      | 79 (8.0)    | 0.2                  | 0.00                        |                 |             |                      |
|                                        | Cystic fibrosis                      | 18 (0.6)       | 5 (0.5)     | 0.7                  | 0.00                        |                 |             |                      |
|                                        | Developmental delay                  | 95 (3.2)       | 31 (3.2)    | 0.9                  | 0.00                        |                 |             |                      |
|                                        | Congenital heart disease             | 176 (5.9)      | 63 (6.4)    | 0.5                  | 0.00                        |                 |             |                      |
|                                        | Neuromuscular disorder               | 31 (1.0)       | 18 (1.8)    | <b>0.049</b>         | 0.00                        |                 |             |                      |
|                                        | Neural tube defect                   | 37 (1.2)       | 15 (1.5)    | 0.5                  | 0.00                        |                 |             |                      |
|                                        | Neonatal death                       | 214 (7.1)      | 84 (8.6)    | 0.14                 | 0.00                        |                 |             |                      |
|                                        | Blood disorder                       | 135 (4.5)      | 69 (7.0)    | <b>0.002</b>         | 0.00                        |                 |             |                      |
|                                        | Intrauterine fetal demise            | 200 (6.7)      | 147 (15.0)  | <0.001               | 0.00                        |                 |             |                      |
|                                        | Recurrent pregnancy loss             | 164 (5.5)      | 88 (9.0)    | <0.001               | 0.00                        |                 |             |                      |
|                                        | Diabetes                             | 427 (24.1)     | 173 (30.4)  | <b>0.003</b>         | 41.3                        | 431 (14.4)      | 175 (17.8)  | <b>0.009</b>         |
| Maternal health history                | Any chronic condition                | 1310 (43.7)    | 410 (41.8)  | 0.3                  | 0.00                        |                 |             |                      |
|                                        | Asthma                               | 202 (11.3)     | 68 (11.8)   | 0.7                  | 40.8                        | 202 (6.7)       | 68 (6.9)    | 0.8                  |
|                                        | Blood disorder                       | 997 (33.2)     | 321 (32.7)  | 0.8                  | 0.00                        |                 |             |                      |
|                                        | Cardiovascular disease               | 1147 (38.2)    | 350 (35.6)  | 0.15                 | 0.00                        |                 |             |                      |
|                                        | Cancer                               | 20 (1.1)       | 4 (0.7)     | 0.4                  | 40.9                        | 20 (0.7)        | 4 (0.4)     | 0.4                  |
|                                        | Gastrointestinal disorder            | 816 (27.2)     | 281 (28.6)  | 0.4                  | 0.00                        |                 |             |                      |
|                                        | Hypertension (pre-pregnancy)         | 264 (14.8)     | 86 (15.0)   | 0.9                  | 40.8                        | 266 (8.9)       | 88 (9.0)    | 0.9                  |

|                          |                                                    |               |               |                  |      |               |               |                  |
|--------------------------|----------------------------------------------------|---------------|---------------|------------------|------|---------------|---------------|------------------|
|                          | Diabetes (pre-pregnancy)                           | 57 (3.2)      | 36 (6.3)      | <b>0.001</b>     | 40.9 | 58 (1.9)      | 36 (3.7)      | <b>0.002</b>     |
|                          | Obesity (body mass index $\geq 30$ )               | 409 (13.6)    | 168 (17.1)    | <b>0.007</b>     | 0.00 |               |               |                  |
|                          | Rheumatologic disease                              | 737 (24.6)    | 241 (24.5)    | 0.9              | 0.00 |               |               |                  |
|                          | Kidney disease                                     | 1140 (38.0)   | 350 (35.6)    | 0.2              | 0.00 |               |               |                  |
|                          | Thyroid disease                                    | 63 (2.1)      | 21 (2.1)      | 0.9              | 0.00 |               |               |                  |
|                          | Mental health condition                            | 838 (27.9)    | 304 (31.0)    | 0.069            | 0.00 |               |               |                  |
|                          | Depression                                         | 825 (46.5)    | 293 (51.6)    | <b>0.036</b>     | 41.2 | 825 (27.5)    | 294 (29.9)    | 0.14             |
|                          | Seizures                                           | 24 (1.3)      | 12 (2.1)      | 0.2              | 40.9 | 24 (0.8)      | 12 (1.2)      | 0.2              |
|                          | Sexually transmitted infection                     | 239 (8.0)     | 94 (9.6)      | 0.11             | 0.00 |               |               |                  |
|                          | Surgery                                            | 983 (54.0)    | 342 (56.7)    | 0.2              | 39.1 | 1176 (39.2)   | 446 (45.4)    | <b>&lt;0.001</b> |
|                          | Urinary tract infection                            | 445 (25.0)    | 162 (28.2)    | 0.12             | 40.9 | 446 (14.9)    | 162 (16.5)    | 0.2              |
| Obstetric history        | Intrauterine fetal demise                          | 22 (0.7)      | 120 (12.2)    | <b>&lt;0.001</b> | 0.00 |               |               |                  |
|                          | Fertility treatment                                | 360 (12.0)    | 139 (14.2)    | 0.077            | 0.00 |               |               |                  |
|                          | Spontaneous abortion                               | 280 (32.1)    | 129 (48.5)    | <b>&lt;0.001</b> | 71.4 | 431 (14.4)    | 205 (20.9)    | <b>&lt;0.001</b> |
|                          | Total pregnancies (number)                         | 2.7 $\pm$ 1.7 | 2.8 $\pm$ 1.9 | 0.4              | 40.8 | 2.7 $\pm$ 1.4 | 2.7 $\pm$ 1.6 | 0.5              |
| Social history           | Received income assistance                         | 909 (30.3)    | 271 (27.6)    | 0.11             | 0.00 |               |               |                  |
|                          | History of emotional abuse                         | 22 (1.5)      | 3 (0.6)       | 0.2              | 51.6 | 28 (0.9)      | 3 (0.3)       | 0.052            |
|                          | History of physical abuse                          | 38 (2.5)      | 9 (1.9)       | 0.4              | 50.0 | 41 (1.4)      | 10 (1.0)      | 0.4              |
|                          | History of sexual abuse                            | 8 (0.6)       | 0 (0.0)       | 0.2              | 56.1 | 11 (0.4)      | 2 (0.2)       | 0.7              |
|                          | Significant life events 12 months before pregnancy | 2.1 $\pm$ 2.0 | 2.5 $\pm$ 2.2 | <b>&lt;0.001</b> | 42.5 | 1.7 $\pm$ 1.6 | 1.9 $\pm$ 1.8 | <b>&lt;0.001</b> |
|                          | Marital status (married)                           | 984 (55.2)    | 283 (49.3)    | <b>0.014</b>     | 40.8 | 1994 (66.5)   | 597 (60.8)    | <b>0.001</b>     |
|                          | Moved during pregnancy                             | 546 (30.6)    | 176 (30.7)    | 0.9              | 40.8 | 656 (21.9)    | 181 (18.4)    | <b>0.022</b>     |
|                          | Biologic father of baby involved in pregnancy care | 1377 (77.2)   | 411 (71.6)    | <b>0.006</b>     | 40.8 | 2587 (86.2)   | 816 (83.1)    | <b>0.015</b>     |
|                          | Partner desired pregnancy                          | 1255 (75.2)   | 405 (75.1)    | 0.9              | 44.6 | 2533 (84.4)   | 829 (84.4)    | 0.9              |
|                          | Patient desired pregnancy                          | 979 (55.3)    | 327 (57.4)    | 0.4              | 41.2 | 1830 (61.0)   | 665 (67.7)    | <b>&lt;0.001</b> |
|                          | Unstable living situation                          | 148 (4.9)     | 52 (5.3)      | 0.7              | 0.00 |               |               |                  |
| Substance use            | Smoking during pregnancy                           | 303 (10.1)    | 132 (13.4)    | <b>0.004</b>     | 0.00 |               |               |                  |
|                          | Alcohol during pregnancy                           | 708 (23.6)    | 234 (23.8)    | 0.9              | 0.00 |               |               |                  |
|                          | Other drug use during pregnancy                    | 71 (2.4)      | 36 (3.7)      | <b>0.029</b>     | 0.00 |               |               |                  |
| Prenatal laboratory data | Anemia screen (positive)                           | 543 (18.1)    | 109 (11.1)    | <b>&lt;0.001</b> | 0.00 |               |               |                  |
|                          | Rubella screen (positive)                          | 104 (6.2)     | 35 (6.8)      | 0.7              | 45.1 | 104 (3.5)     | 35 (3.6)      | 0.9              |
|                          | Chlamydia (positive)                               | 68 (5.1)      | 28 (7.3)      | 0.10             | 57.1 | 68 (2.3)      | 31 (3.2)      | 0.12             |
|                          | Gonorrhea (positive)                               | 16 (1.2)      | 7 (1.8)       | 0.4              | 57.3 | 16 (0.5)      | 8 (0.8)       | 0.3              |

|                                  |                                                    |              |              |                  |           |             |              |                  |
|----------------------------------|----------------------------------------------------|--------------|--------------|------------------|-----------|-------------|--------------|------------------|
|                                  | Syphilis (positive)                                | 13 (0.8)     | 3 (0.6)      | 0.8              | 44.2      | 13 (0.4)    | 4 (0.4)      | 0.9              |
|                                  | Diabetic screen (positive)                         | 214 (7.1)    | 52 (5.3)     | <b>0.045</b>     | NA        |             |              |                  |
|                                  | Antibodies (positive)                              | 27 (1.6)     | 4 (0.7)      | 0.2              | 43.2      | 27 (0.9)    | 5 (0.5)      | 0.2              |
|                                  | Anti-D antibodies                                  | 1583 (89.2)  | 517 (91.7)   | 0.10             | 41.3      | 2809 (93.6) | 935 (95.2)   | 0.070            |
|                                  | Urine culture (positive)                           | 259 (25.7)   | 85 (27.5)    | 0.5              | 66.9      | 324 (10.8)  | 118 (12.0)   | 0.3              |
|                                  | Bleeding disorder (labor/delivery)                 | 1223 (40.8)  | 458 (46.6)   | <b>0.001</b>     | NA        |             |              |                  |
|                                  | Anemia (labor/delivery)                            | 1070 (35.7)  | 309 (31.4)   | <b>0.018</b>     | NA        |             |              |                  |
|                                  | Leukocytosis (labor/delivery)                      | 982 (32.7)   | 380 (38.7)   | <b>&lt;0.001</b> | NA        |             |              |                  |
|                                  | Thrombocytopenia (labor/delivery)                  | 186 (6.2)    | 79 (8.0)     | <b>0.044</b>     | NA        |             |              |                  |
|                                  | Proteinuria                                        | 935 (31.2)   | 261 (26.6)   | <b>0.006</b>     | NA        |             |              |                  |
| 2nd trimester (quad) screen      | Down syndrome risk (given as ratio, 1:x)           | 8328 ± 14358 | 7163 ± 11637 | <b>0.034</b>     | 77.7      | 7182 ± 8189 | 7262 ± 7230  | <b>0.049</b>     |
|                                  | hCG (MoM)                                          | 1.07 ± 0.60  | 1.25 ± 1.06  | 0.5              | 78.2      | 1.15 ± 0.37 | 1.29 ± 0.58  | <b>&lt;0.001</b> |
|                                  | MSAFP (MoM)                                        | 1.12 ± 0.60  | 1.38 ± 0.95  | <b>&lt;0.001</b> | 77.4      | 1.18 ± 0.36 | 1.34 ± 0.59  | <b>&lt;0.001</b> |
|                                  | UE3 (MoM)                                          | 1.06 ± 0.46  | 0.99 ± 0.44  | <b>0.043</b>     | 78.4      | 1.12 ± 0.28 | 1.05 ± 0.29  | <b>&lt;0.001</b> |
| Prenatal care                    | Fluid loss                                         | 163 (9.1)    | 83 (14.5)    | <b>&lt;0.001</b> | NA        |             |              |                  |
|                                  | Abdominal pain (prior to onset of labor)           | 745 (24.8)   | 255 (26.0)   | 0.5              | NA        |             |              |                  |
|                                  | Vaginal bleeding                                   | 278 (9.3)    | 118 (12.0)   | <b>0.012</b>     | NA        |             |              |                  |
|                                  | Hospitalization (prior to delivery)                | 653 (21.8)   | 203 (20.7)   | 0.5              | NA        |             |              |                  |
|                                  | Preterm labor (prior to delivery)                  | 220 (7.3)    | 35 (3.6)     | <b>&lt;0.001</b> | NA        |             |              |                  |
|                                  | Reduced fetal movement                             | 320 (10.7)   | 343 (34.9)   | <b>&lt;0.001</b> | NA        |             |              |                  |
|                                  | Elevated blood pressure                            | 630 (21.0)   | 212 (21.6)   | 0.7              | NA        |             |              |                  |
|                                  | Influenza during pregnancy                         | 608 (34.1)   | 218 (38.0)   | 0.088            | 40.9      | 615 (20.5)  | 223 (22.7)   | 0.14             |
|                                  | Earliest prenatal visit (GA)                       | 12.1 ± 6.7   | 11.4 ± 5.8   | 0.085            | 42.4      | 18.8 ± 10.2 | 14.9 ± 7.4   | <b>&lt;0.001</b> |
|                                  | Ratio of latest prenatal visit to bGA              | 0.90 ± 0.08  | 0.83 ± 0.11  | <b>&lt;0.001</b> | 0.00      |             |              |                  |
|                                  | Ratio of total prenatal visits to bGA              | 0.12 ± 0.14  | 0.08 ± 0.12  | <b>&lt;0.001</b> | 0.00      |             |              |                  |
| GA at which pregnancy discovered | 6.2 ± 3.9                                          | 6.9 ± 4.6    | <b>0.033</b> | 57.0             | 7.2 ± 3.1 | 7.1 ± 3.2   | <b>0.002</b> |                  |
| Ultrasound                       | Fetal anomaly                                      | 63 (2.1)     | 72 (7.3)     | <b>&lt;0.001</b> | NA        |             |              |                  |
|                                  | Sex (female)                                       | 1459 (48.6)  | 411 (41.9)   | <b>&lt;0.001</b> |           |             |              |                  |
|                                  | 10-week ultrasound (completed)                     | 554 (18.5)   | 196 (20.0)   | 0.3              | 0.00      |             |              |                  |
|                                  | Anatomy ultrasound (completed)                     | 1151 (38.4)  | 421 (42.9)   | <b>0.012</b>     | 0.00      |             |              |                  |
|                                  | Abnormal fluid (oligohydramnios or polyhydramnios) | 80 (2.7)     | 97 (9.9)     | <b>&lt;0.001</b> | NA        |             |              |                  |

|                                                                                                                      |                 |                 |                  |      |                |                |                  |
|----------------------------------------------------------------------------------------------------------------------|-----------------|-----------------|------------------|------|----------------|----------------|------------------|
| Abnormal growth (large [ $>90^{\text{th}}$ percentile] or small [ $<10^{\text{th}}$ percentile] for gestational age) | 65 (2.2)        | 44 (4.5)        | <b>&lt;0.001</b> | NA   |                |                |                  |
| Placental anomalies                                                                                                  | 131 (4.4)       | 57 (5.8)        | 0.065            | NA   |                |                |                  |
| Earliest ultrasound (GA)                                                                                             | 16.2 $\pm$ 7.9  | 15.1 $\pm$ 7.0  | <b>0.026</b>     | 44.6 | 21.8 $\pm$ 9.2 | 18.9 $\pm$ 7.5 | <b>&lt;0.001</b> |
| Ratio of latest ultrasound to bGA                                                                                    | 0.72 $\pm$ 0.16 | 0.81 $\pm$ 0.14 | <b>&lt;0.001</b> | NA   |                |                |                  |

*All values given as mean  $\pm$  standard deviation (continuous measures) or number (percentage) (categorical variables). Empty cells listed in post-imputation columns indicate that variable did not require imputation.*

*<sup>1</sup>P-values comparing stillbirths versus livebirths; Mann-Whitney test used for continuous measures, Chi-Square for categorical measures. P-values  $<0.05$  are considered significant (bolded).*

*Abbreviations: hCG = human chorionic gonadotropin; MoM = multiples of median; MSAFP = maternal serum alpha-feto protein; UE3 = unconjugated estriol; GA = gestational age; bGA = gestational age at birth/delivery*
