# Supplementary material
Source: PubMed Central journal article supplement (PMC10527568)

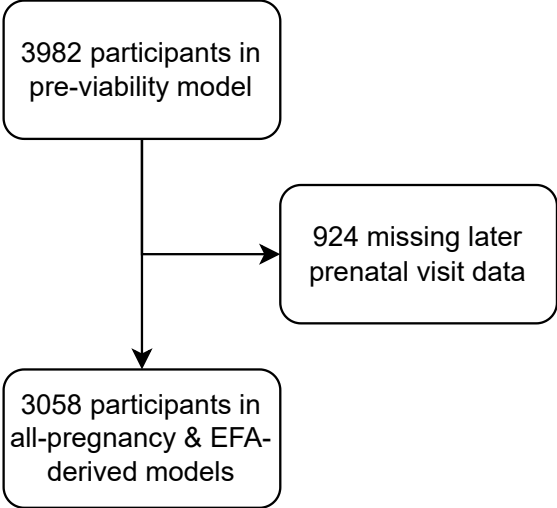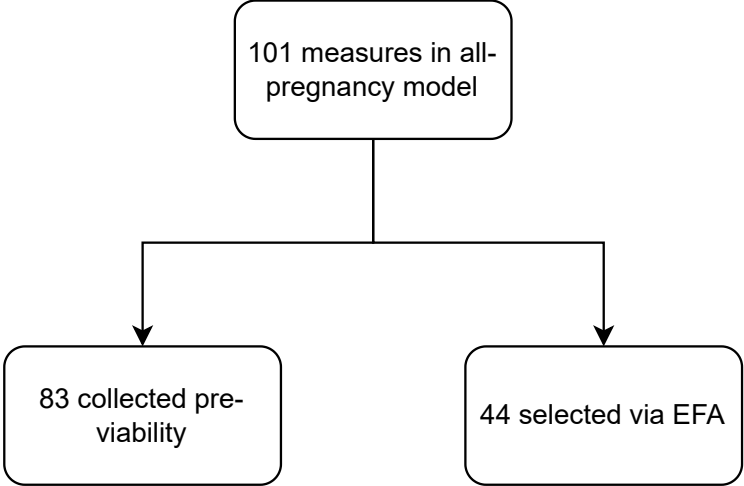

Supplement: NIHMS1909202-supplement-1.pdf [file NIHMS1909202-supplement-1.pdf]
